# Supplementary material for: Staggering transport of edge states and symmetry analysis of electronic and optical properties of stanene
Source: Royal Society of Chemistry journal article supplement (doi:10.1039/d0nr05133k), 2020-01-01
Supplement: d0nr05133k1.pdf [file d0nr05133k1.pdf]

## Supporting Information

### Staggering Transport of Edge States and Symmetry Analysis of Electronic and Optical Properties of Stanene

Yongqing Cai, Gang Zhang\*, and Yong-Wei Zhang\*

Institute of High Performance Computing, A\*STAR, Singapore 138632

Email: zhangg@ihpc.a-star.edu.sg; [zhangyw@ihpc.a-star.edu.sg](mailto:zhangyw@ihpc.a-star.edu.sg)

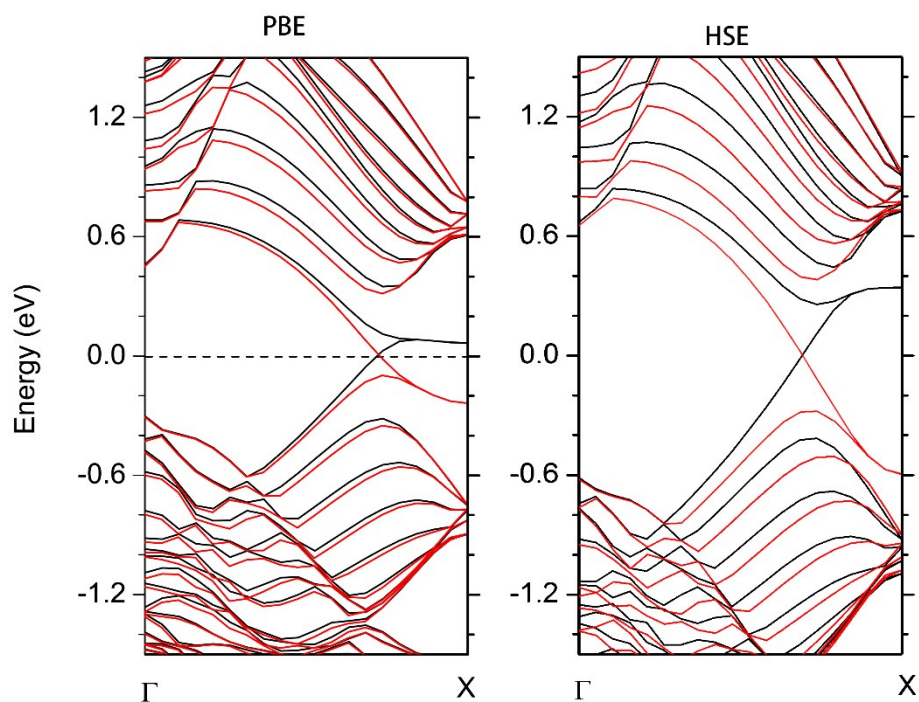

Figure S1. Band structures of stanene zigzag nanoribbon with the edges passivated by H atoms with PBE and HSE calculations.
